# Supplementary material
Source: PubMed Central journal article supplement (PMC4347735)
Supplement: supp_pp.114.252742_252742Wilkins_et_al_Supplemental_figure_1.pdf [file supp_pp.114.252742_252742Wilkins_et_al_Supplemental_figure_1.pdf]

Wilkins et al.

**Supplemental Figure 1. Calibration of the cytosolic pH of *Papaver* pollen tube with the pH indicator BCECF AM**

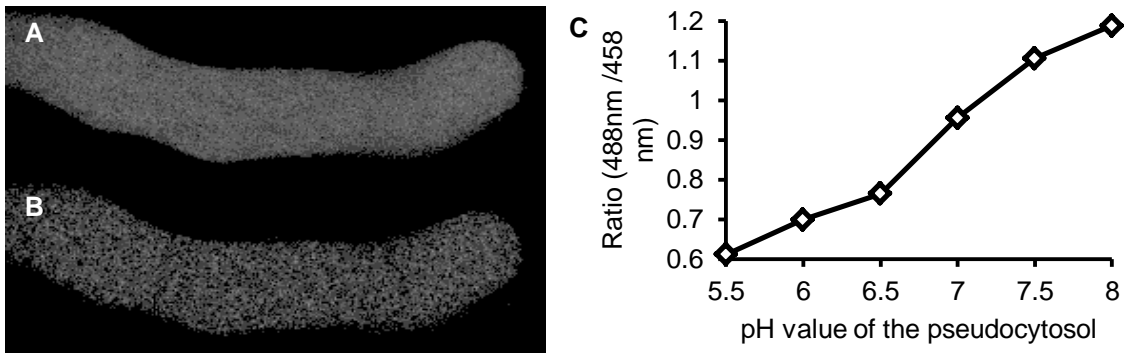

**Wilkins et al. Supplemental Figure 1. Calibration of the cytosolic pH of *Papaver* pollen tube with the pH indicator BCECF AM**

A healthy, growing pollen tube was labelled with the pH indicator BCECF-AM prior to ratiometric imaging using confocal microscopy. A ratio value was made of the two images using Image J; this ratio was used to determine the pH of the pollen tube cytosol using a calibration curve (C), collected during the same experiment. This pollen tube has a cytosolic pH of 6.8.

(A) BCECF-AM signal when excited at 488 nm, emission at 510-550 nm. (B) BCECF-AM signal when excited at 458 nm, emission at 510-550 nm. (C) Pseudocytosol solutions of between pH 5-8, at approximately 0.5 intervals, were labelled with BCECF free acid and sequential confocal images were collected (excitation 488nm, then 458nm, emission 510-550 nm). A ratio of the two images was calculated and plotted as ratio: pH values.
