# Supplementary material
Source: PubMed Central journal article supplement (PMC4347735)
Supplement: supp_pp.114.252742_252742Wilkins_et_al_Supplemental_figure_3.pdf [file supp_pp.114.252742_252742Wilkins_et_al_Supplemental_figure_3.pdf]

**Supplemental Figure 3. Ratiometric-imaging of BCECF-labelled SI-induced pollen tubes reveal cytosolic acidification**

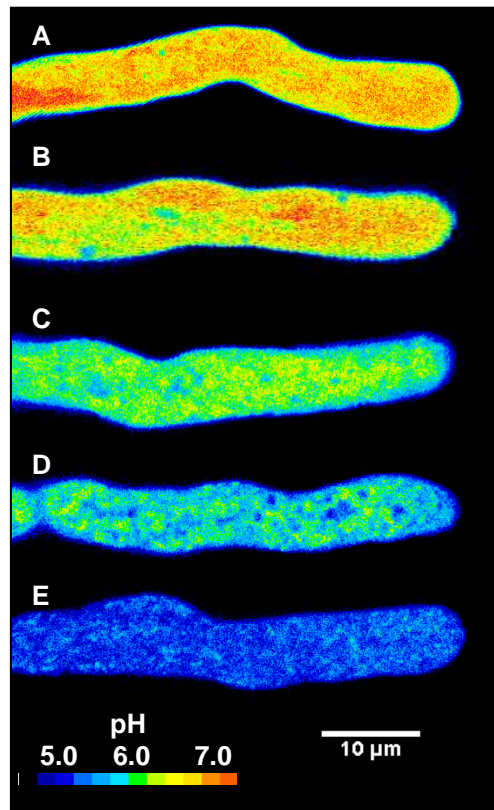

**Supplemental Figure 3. Ratiometric-imaging of BCECF-labelled SI-induced pollen tubes reveal cytosolic acidification**

(A-E) Representative ratiometric images of pollen tube cytosol using the pH indicator BCECF AM (488 nm excitation and 510-550 emission) after background subtraction.

(A) Untreated pollen tube cytosol at T=0, pH 7.1. (B) Untreated pollen tube cytosol at T=60, pH 7.15. (C) SI-induced pollen tube cytosol 10 min after addition of PrsS, pH 6.4. (D) SI-induced pollen tube 30 min after addition of PrsS, pH 6.1. (E) SI-induced pollen tube 60 min after addition of PrsS, pH 5.5. Calibration of the cytosolic pH is indicated by the inset colour scale. Scale bar 10 μm.
