# Supplementary material
Source: PubMed Central journal article supplement (PMC4347735)
Supplement: supp_pp.114.252742_252742Wilkins_et_al_Supplemental_figure_4.pdf [file supp_pp.114.252742_252742Wilkins_et_al_Supplemental_figure_4.pdf]

Wilkins et al. **Supplemental Figure 4. Acidification of the pollen tube cytosol triggers the formation of punctate F-actin foci and co-localization of CAP and ADF**

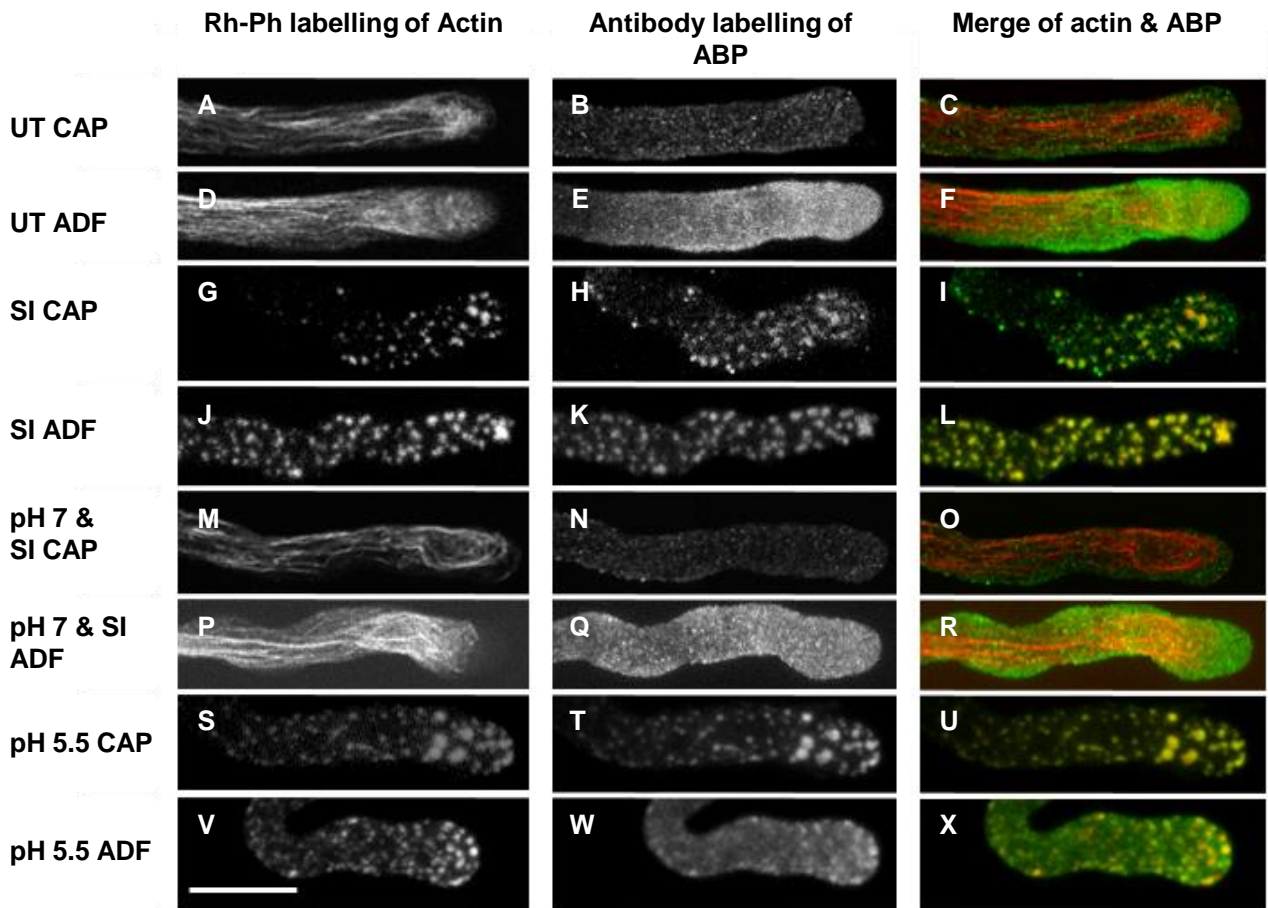

**Supplemental Figure 4. Acidification of the pollen tube cytosol triggers the formation of punctate F-actin foci and co-localization of CAP and ADF**

Representative images of untreated pollen tubes showing Rhodamine-Phalloidin (Rh-Ph) labelling of actin (first column), immunolocalized with either rabbit anti-AtCAP1 (CAP; cyclase-associated protein) or rabbit anti-LIADF (ADF; actin-depolymerizing factor) antibodies (second column), and merged images of Rh-Ph (red) and antibody labelling (green) (third column), following 3 h treatment with growth medium (UT), SI, propionic acid pH 5.5, propionic acid pH 7 & SI.

(A) Untreated F-actin, (B) Untreated CAP, (C) Merge of (A) and (B). (D) Untreated F-actin, (E) Untreated ADF, (F) Merge of (D) and (E). (G) SI F-actin, (H) SI CAP, (I) Merge of (G) and (H). (J) SI F-actin, (K) SI ADF, (L) Merge of (J) and (K). (M) pH 7 and SI F-actin, (N) pH 7 and SI CAP, (O) Merge of (M) and (N). (P) pH 7 and SI F-actin, (Q) pH 7 and SI ADF, (R) Merge of (P) and (Q). (S) pH 5.5 F-actin, (T) pH 5.5 CAP, (U) Merge of (S) and (T). (V) pH 5.5 F-actin, (W) pH 5.5 ADF, (X) Merge of (V) and (W). Scale bar = 10  $\mu$ m.
