# Supplementary material
Source: PubMed Central journal article supplement (PMC4347735)
Supplement: supp_pp.114.252742_252742Wilkins_et_al_Supplemental_figure_5.pdf [file supp_pp.114.252742_252742Wilkins_et_al_Supplemental_figure_5.pdf]

Wilkins et al.

**Supplemental Figure 5. Quantification of SI-induced alterations in vacuolar morphology**

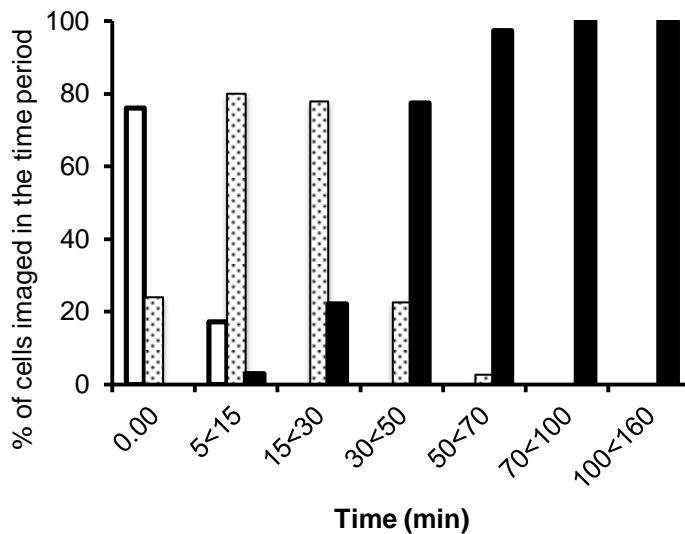

**Supplemental Figure 5. Quantification of SI-induced alterations in vacuolar morphology**

Pollen was labelled with the vacuolar marker c-DCFDA and the SI response was induced by the addition of PrsS. Pollen tubes were then assigned to one of three categories referring to vacuolar morphology. These categories includes (i) clear reticulate vacuolar network, white bars, (ii) reorganization, dotted bars, and (iii) extensive breakdown with no distinct network, black bars. N=214.
